# Supplementary material for: Different spreading dynamics throughout Germany during the second wave of the COVID-19 pandemic: a time series study based on national surveillance data
Source: PubMed Central journal article supplement (PMC8454815; doi:10.1016/j.lanepe.2021.100151), 2021-06-27

# Supplemental Figure 5

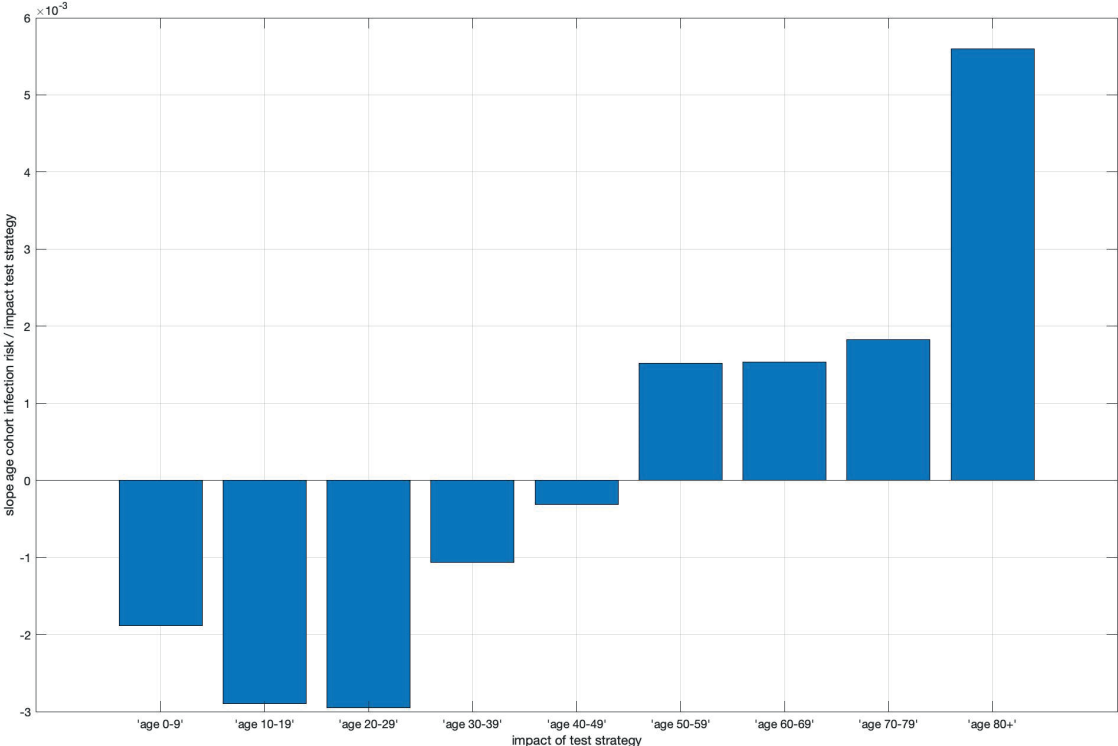

Supplement: mmc6.pdf [file mmc6.pdf]
